# Supplementary material
Source: publisher figshare collection journal article supplement (https://tandf.figshare.com/ndownloader/files/22809197)
Supplement: Supplementary file 1 [file 22809197]

## 1 Appendix 1. Sample search strategy for Pubmed

|    |                                                                                                                                                                          |
|----|--------------------------------------------------------------------------------------------------------------------------------------------------------------------------|
| 1  | "pulmonary disease, chronic obstructive"[MeSH Terms]                                                                                                                     |
| 2  | "COPD"[All Fields]                                                                                                                                                       |
| 3  | "Chronic obstructive pulmonary disease"[All Fields]                                                                                                                      |
| 4  | "COAD"[All Fields]                                                                                                                                                       |
| 5  | "Chronic obstructive airway disease"[All Fields]                                                                                                                         |
| 6  | "Chronic obstructive lung disease"[All Fields]                                                                                                                           |
| 7  | "Chronic"[All Fields] AND "Obstruction"[All Fields] AND ("Airflow"[All Fields] OR "Airway"[All Fields])                                                                  |
| 8  | #1 OR #2 OR #3 OR #4 OR #5 OR #6 OR #7                                                                                                                                   |
| 9  | "Sputum*"[All Fields]                                                                                                                                                    |
| 10 | "Purulent"[All Fields] OR "Purulence"[All Fields] OR "Color"[MeSH Terms] OR "Color"[All Fields] OR "Colors"[All Fields] OR "Colour"[All Fields] OR "Colours"[All Fields] |
| 11 | #9 AND #10                                                                                                                                                               |
| 12 | #8 AND #11                                                                                                                                                               |

2

3

4 **Appendix 2. Excluded studies**

5

| No. | Excluded studies                                                                                                                                                                                     | Reasons for exclusion                |
|-----|------------------------------------------------------------------------------------------------------------------------------------------------------------------------------------------------------|--------------------------------------|
| 1   | Is sputum color a good predictor of bacterial infection in patients with acute exacerbations of chronic bronchitis?. American thoracic society 99th international conference: A016.                  | No abstract or full text available   |
| 2   | Relation of sputum colour to bacterial load in acute exacerbations of COPD. Respir Med 103(4): 601-606.                                                                                              | No outcome data available            |
| 3   | Indicators of bacterial infection in patients with acute exacerbation of chronic bronchitis for application in clinical trials of antibacterial drugs. J Infect 55(3): 226-232.                      | Only microscopic purulence available |
| 4   | Does sputum colour hold the answer? The AERIS study. European Respiratory Journal 46.                                                                                                                | No outcome data available            |
| 5   | Bacterial infection in hospitalized patients of acute exacerbation of COPD and their relation to lung function: A prospective study. European Respiratory Journal 48.                                | No outcome data available            |
| 6   | Correlation between sputum colour and isolation of an infecting organism in patients with acute exacerbations of chronic bronchitis (AECB). European Respiratory Journal 30(Suppl 51): 405s [P2392]. | No abstract or full text available   |

|    |                                                                                                                                                                                         |                                       |
|----|-----------------------------------------------------------------------------------------------------------------------------------------------------------------------------------------|---------------------------------------|
| 7  | Colour of sputum is a marker for bacterial colonization in chronic obstructive pulmonary disease. <i>Respir Res</i> 11: 58.                                                             | Not COPD patients                     |
| 8  | Relationship between bacterial colonization and the frequency, character, and severity of COPD exacerbations. <i>Thorax</i> 57(9): 759-764.                                             | No outcome data available             |
| 9  | Sputum bacteriology in acute exacerbation of COPD: Utility of sputum appearance and previous culture results in determining antibiotic therapy. <i>Thorax</i> 64: A116-A117.            | No outcome data available             |
| 10 | Sputum color and the detection of colonizing bacteria by quantitative PCR in stable COPD. <i>American Journal of Respiratory and Critical Care Medicine</i> 189.                        | No outcome data available             |
| 11 | Yield of sputum microbiological examination in patients hospitalized for exacerbations of chronic obstructive pulmonary disease with purulent sputum." <i>Respiration</i> 74(1): 19-25. | Only purulent sputum samples included |
